# Supplementary material for: Cu2O hollow structures—microstructural evolution and photocatalytic properties
Source: Royal Society of Chemistry journal article supplement (doi:10.1039/c6ra22474a), 2016-01-01
Supplement: c6ra22474a1.pdf [file c6ra22474a1.pdf]

## Cu<sub>2</sub>O hollow structures—microstructural evolution and photocatalytic property

Baoshun Wang<sup>a</sup>, Weiwei Zhang<sup>b</sup>, Zhiyun Zhang<sup>a</sup>, Renying Li<sup>a</sup>, Yulong Wu<sup>a</sup>, Zhengguang Hu<sup>a</sup>, Xiaoling Wu<sup>a</sup>, Chungang Guo<sup>a</sup>, Guoan Cheng<sup>a</sup>, Ruiting Zheng<sup>\*1a</sup>

<sup>a</sup> Key Laboratory of Radiation Beam Technology and Materials Modification of Ministry of Education, College of Nuclear Science and Technology, Beijing Normal University, Beijing 100875, P. R. China

<sup>b</sup> School of Science, Minzu University of China, Beijing 10081, PR China

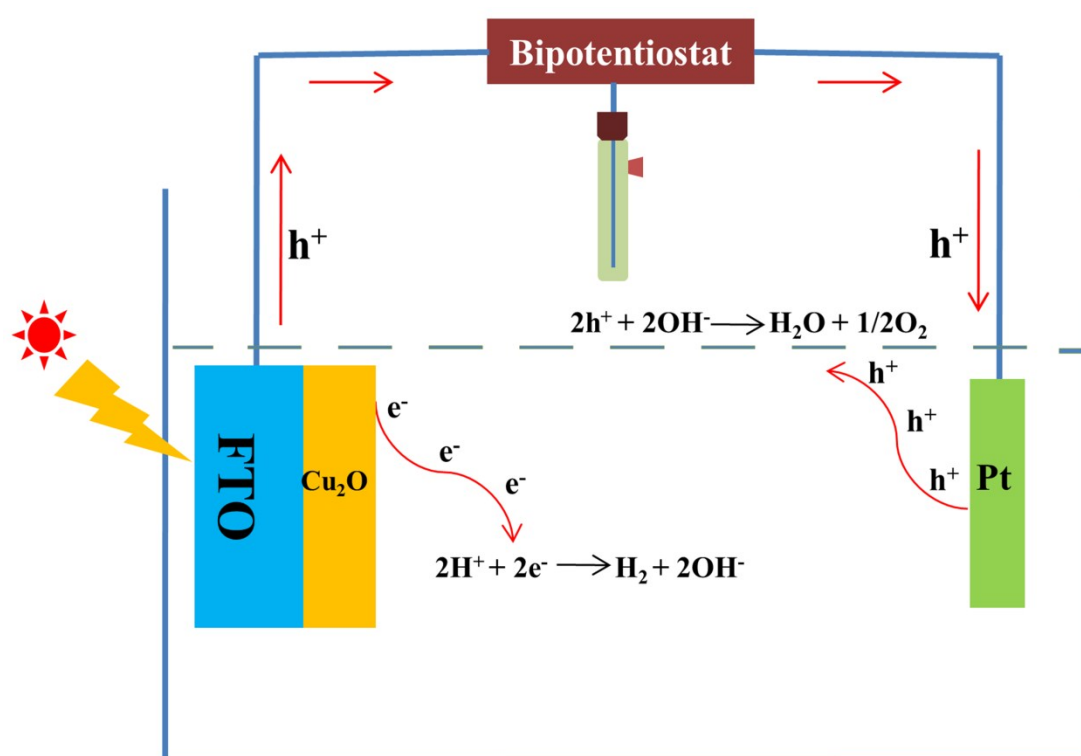

Fig. S1 Schematic diagram of the PEC device for photocurrent measurement.

1 \*corresponding-author: rrtzheng@bnu.edu.cn

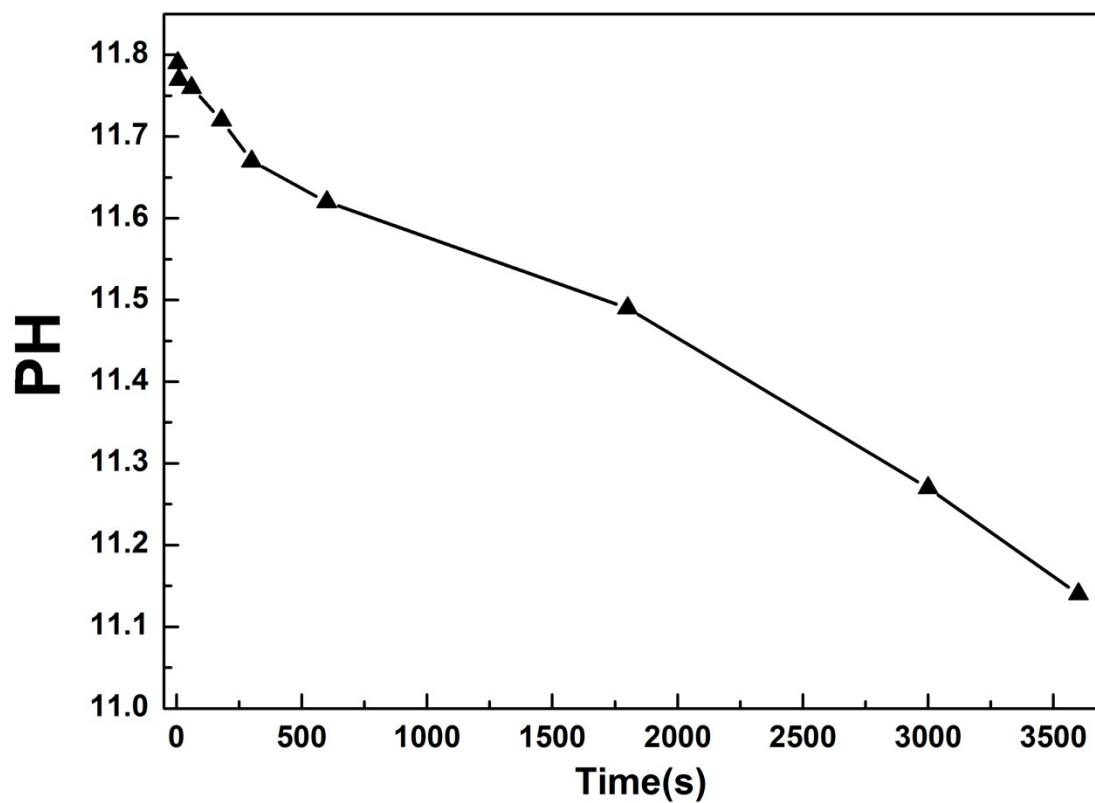

Fig. S2 The corresponding solution PH value of different reaction time.

Fig. S2 shows the PH of the solution at different time. We have found that the PH value of the solution decrease gradually with the increase of reaction time.

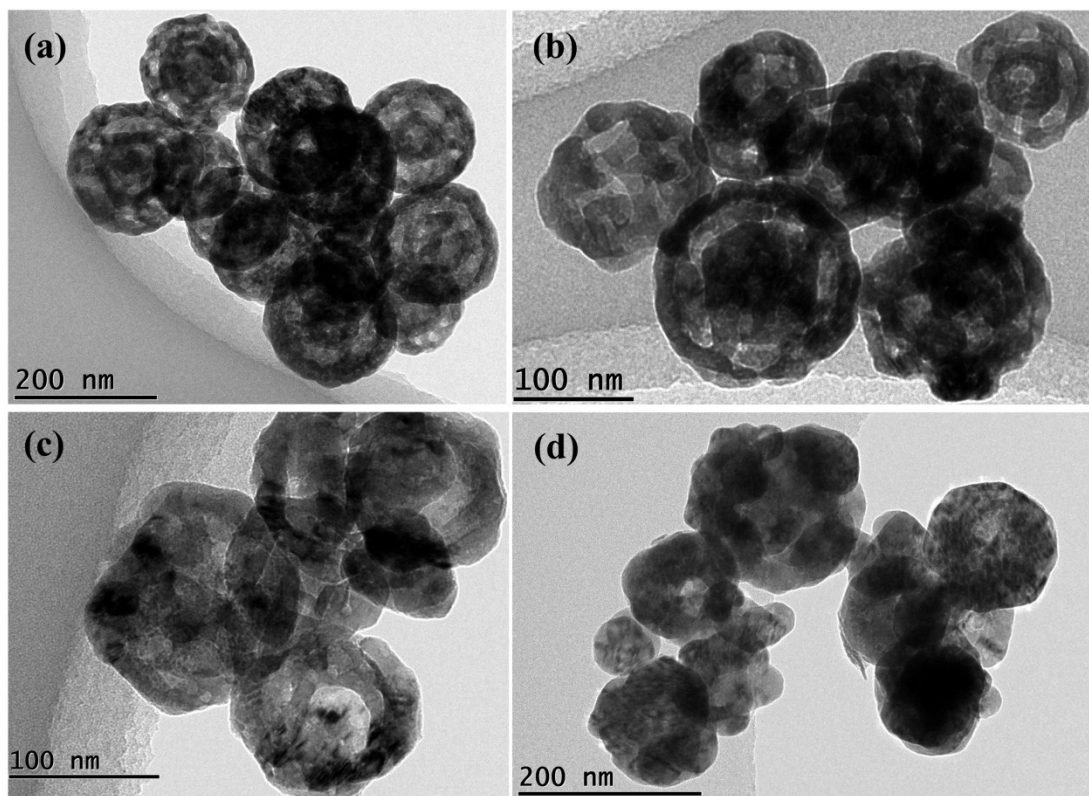

Fig. S3 TEM images of  $\text{Cu}_2\text{O}$  sub-micron structures obtained at different concentrations of NaOH respectively, (a) 0.2 M, (b) 0.3M, (c) 0.5M, (d) 2.5M..

Fig. S3 shows the different structure of  $\text{Cu}_2\text{O}$  hollow spheres obtained at different NaOH concentrations. As shown in Fig. S3(a), (b), (c), (d), the NaOH concentration are 0.2 M, 0.3M, 0.5M, 2.5M, respectively, while the other reaction conditions unchanged (keep the reaction for 5 minutes). We found that with the increase of alkaline, Multi-Shelled Hollow Spheres  $\text{Cu}_2\text{O}$  (Fig. S3(a)) gradually changed into Multi-Shelled Porous Spheres  $\text{Cu}_2\text{O}$  (Fig. S3(c)), with the further increase of alkaline, Single-Shelled Hollow Spheres  $\text{Cu}_2\text{O}$  (Fig. S3(d)) were formed. At the same time, we can find that the shell thickness of the particles increases gradually with the increase of time. So we can confirm that the different structure of  $\text{Cu}_2\text{O}$  hollow nanoparticles can be adjusted by changing alkalinity of the solution.
